# Supplementary material for: Phenotypic Diversity Analysis and Superior Family Selection of Industrial Raw Material Forest Species-Pinus yunnanensis Franch
Source: MDPI journal article supplement (doi:10.3390/f13040618), 2022-04-15
Supplement: s1 [file s1]

**Table S1.** Measurement method and the type of twelve traits.

|                     | PH (cm)        | DBH (mm)         | LCD (cm)     | SCD (cm)     | HUB (cm)       | LMB (cm)     | NLB (piece)  | NLBY (piece) | LN (cm)      | WN (mm)          | LLS (mm)     | NFW (mm)         |
|---------------------|----------------|------------------|--------------|--------------|----------------|--------------|--------------|--------------|--------------|------------------|--------------|------------------|
| Measurement methods | tree altimeter | vernier calliper | tower ruler  | tower ruler  | tree altimeter | ruler        | count        | count        | ruler        | vernier calliper | ruler        | vernier calliper |
| Trait type          | quantitative   | quantitative     | quantitative | quantitative | quantitative   | quantitative | quantitative | quantitative | quantitative | quantitative     | quantitative | quantitative     |

Phenotypic trait abbreviations are shown in Figure 2.

**Table S2.** Comprehensive scoring assessment criteria for each trait of *P. yunnanensis*.

| Scores | PH (cm)     | DBH (mm)    | LCD (cm)    | SCD (cm)    | HUB (cm)  | LMB (cm)  | NLB (piece) | NLBY (piece) | LN (cm)   | WN (mm) | LLS (mm)  | NFW (mm) |
|--------|-------------|-------------|-------------|-------------|-----------|-----------|-------------|--------------|-----------|---------|-----------|----------|
| 1      | 37.5-50.2   | 28.2-37.5   | 83.7-92.4   | 20.3-32.4   | 0.0-5.6   | 5.0-13.6  | 0.0-0.1     | 0.0-0.1      | 1.2-4.8   | 0.6-0.7 | 2.2-4.1   | 0.0-0.4  |
| 2      | 50.2-62.9   | 37.5-46.9   | 92.4-101.1  | 32.4-44.5   | 5.6-11.3  | 13.6-22.1 | 0.1-0.2     | 0.1-0.2      | 4.8-8.5   | 0.7-0.8 | 4.1-6.0   | 0.4-0.8  |
| 3      | 62.9-75.6   | 46.9-56.2   | 101.1-109.9 | 44.5-56.6   | 11.3-16.9 | 22.1-30.2 | 0.2-0.3     | 0.2-0.3      | 8.5-12.2  | 0.8-0.9 | 6.0-7.9   | 0.8-1.2  |
| 4      | 75.6-88.2   | 56.2-65.5   | 109.9-118.6 | 56.6-68.7   | 16.9-22.5 | 30.2-39.3 | 0.3-0.4     | 0.3-0.4      | 12.2-15.9 | 0.9-1.0 | 7.9-9.8   | 1.2-1.6  |
| 5      | 88.2-100.9  | 65.5-74.8   | 118.6-127.3 | 68.7-80.8   | 22.5-28.2 | 39.3-47.9 | 0.4-0.5     | 0.4-0.5      | 15.9-19.6 | 1.0-1.1 | 9.8-11.7  | 1.6-2.0  |
| 6      | 100.9-113.6 | 74.8-84.1   | 127.3-136.1 | 80.8-92.9   | 28.2-33.8 | 47.9-56.4 | 0.5-0.6     | 0.5-0.6      | 19.6-23.3 | 1.1-1.2 | 11.7-13.6 | 2.0-2.4  |
| 7      | 113.6-126.2 | 84.1-93.4   | 136.1-144.8 | 92.9-105.0  | 33.8-39.4 | 56.4-65.0 | 0.6-0.7     | 0.6-0.7      | 23.3-27.0 | 1.2-1.3 | 13.6-15.5 | 2.4-2.8  |
| 8      | 126.3-139.0 | 93.4-102.7  | 144.8-153.5 | 105.0-117.1 | 39.4-45.0 | 65.0-73.6 | 0.7-0.8     | 0.7-0.8      | 27.0-30.7 | 1.3-1.4 | 15.5-17.4 | 2.8-3.2  |
| 9      | 139.0-151.6 | 102.7-112.0 | 153.5-162.2 | 117.1-129.2 | 45.0-50.7 | 73.6-82.1 | 0.8-0.9     | 0.8-0.9      | 30.7-34.4 | 1.4-1.5 | 17.4-19.3 | 3.2-3.6  |
| 10     | 151.6-164.3 | 112.0-121.3 | 162.2-171.0 | 129.2-141.3 | 50.7-56.3 | 82.1-90.7 | 0.9-1.0     | 0.9-1.0      | 34.4-38.1 | 1.5-1.6 | 19.3-21.2 | 3.6-4.0  |

Phenotypic trait abbreviations are shown in Figure 2.

**Table S3.** The principal component scores and ranking of superior individuals of *P. yunnanensis*.

| Codes | F1   | F2    | F3    | Scores | Ranking |
|-------|------|-------|-------|--------|---------|
| SB29  | 1.14 | 0.39  | -0.11 | 1.42   | 1       |
| SB18  | 1.54 | -0.20 | -0.02 | 1.33   | 2       |
| HZ2   | 0.89 | 0.11  | 0.33  | 1.32   | 3       |
| LF17  | 0.73 | 0.51  | 0.06  | 1.29   | 4       |
| SB25  | 0.89 | 0.40  | 0.00  | 1.29   | 5       |
| LF7   | 1.08 | 0.32  | -0.11 | 1.29   | 6       |
| LF16  | 0.59 | 0.51  | 0.16  | 1.26   | 7       |
| CH7   | 0.61 | 0.48  | 0.16  | 1.25   | 8       |
| LF15  | 1.04 | 0.35  | -0.14 | 1.24   | 9       |
| LF18  | 0.69 | 0.50  | 0.04  | 1.24   | 10      |
| LF24  | 0.87 | 0.48  | -0.13 | 1.22   | 11      |
| CY24  | 1.15 | -0.15 | 0.21  | 1.21   | 12      |
| HZ1   | 0.78 | 0.02  | 0.41  | 1.21   | 13      |
| LF19  | 0.51 | 0.53  | 0.13  | 1.17   | 14      |
| LF3   | 0.70 | 0.20  | 0.27  | 1.16   | 15      |
| XP6   | 1.43 | -0.28 | 0.01  | 1.16   | 16      |
| LF23  | 0.72 | 0.40  | -0.01 | 1.11   | 17      |

|      |      |       |       |      |    |
|------|------|-------|-------|------|----|
| LF8  | 0.76 | 0.29  | 0.04  | 1.09 | 18 |
| LF14 | 0.34 | 0.56  | 0.18  | 1.08 | 19 |
| LF9  | 0.57 | 0.34  | 0.16  | 1.07 | 20 |
| SB10 | 1.21 | -0.06 | -0.11 | 1.04 | 21 |
| CH18 | 0.38 | 0.49  | 0.16  | 1.03 | 22 |
| LF27 | 0.44 | 0.61  | -0.03 | 1.02 | 23 |
| CH8  | 0.81 | 0.21  | -0.01 | 1.01 | 24 |
| CH1  | 0.30 | 0.57  | 0.10  | 0.96 | 25 |

Population abbreviations are shown in Table 1.

**Table S4.** The mean values and realized gains for growth and form quality traits of families of *P. yunnanensis* based on comprehensive scoring and principal component analysis.

| Traits | Comprehensive scoring |              | Principal component analysis |              |
|--------|-----------------------|--------------|------------------------------|--------------|
|        | Mean                  | $\Delta G\%$ | Mean                         | $\Delta G\%$ |
| PH     | 137.06                | 26.89        | 130.84                       | 23.42        |
| DBH    | 55.57                 | 16.75        | 56.62                        | 18.29        |
| LCD    | 144.25                | 17.19        | 140.51                       | 14.99        |
| SCD    | 117.67                | 16.55        | 115.69                       | 15.10        |
| HUB    | 13.28                 | 33.50        | 11.72                        | 24.66        |
| LMB    | 68.56                 | 23.35        | 69.04                        | 23.88        |
| NLB    | 0.82                  | 0.04         | 7.03                         | 1.58         |
| NLBY   | 0.90                  | 1.11         | 4.39                         | 1.22         |
| LN     | 31.48                 | 13.57        | 32.14                        | 15.35        |
| WN     | 1.32                  | 18.34        | 1.34                         | 19.19        |
| LLS    | 15.26                 | 14.15        | 15.99                        | 18.06        |
| NFW    | 2.44                  | 15.84        | 2.54                         | 19.36        |

Phenotypic trait abbreviations are shown in Figure 2.
